# Supplementary material for: The Dutch Acute Stroke Audit: Benchmarking acute stroke care in the Netherlands
Source: PubMed Central journal article supplement — Eur Stroke J. 2018 Jul 11;3(4):361–8. doi: 10.1177/2396987318787695 (PMC6571504; doi:10.1177/2396987318787695), 2018-07-11
Supplement: Supplemental_material1.pdf [file Supplemental_material1.pdf]

## Addendum 1: Data dictionary DASA.

| Variable                                                                                | Optionset                                                               | Definition                                                                                                                                                                                                                                                                                     | Completeness (%)   |
|-----------------------------------------------------------------------------------------|-------------------------------------------------------------------------|------------------------------------------------------------------------------------------------------------------------------------------------------------------------------------------------------------------------------------------------------------------------------------------------|--------------------|
| <b>Patient characteristic</b>                                                           |                                                                         |                                                                                                                                                                                                                                                                                                |                    |
| Patient ID-number*                                                                      |                                                                         | Citizen service number                                                                                                                                                                                                                                                                         | **                 |
| Sex                                                                                     | Male/Female                                                             |                                                                                                                                                                                                                                                                                                | 96.6%              |
| Date of birth*                                                                          |                                                                         | Year of birth                                                                                                                                                                                                                                                                                  | **                 |
| <b>Process indicators</b>                                                               |                                                                         |                                                                                                                                                                                                                                                                                                |                    |
| Onset-time (date/time)                                                                  |                                                                         | The time when symptoms of stroke started reported by patient or observer. In case the patient had a stroke during sleep, or the patient could not recall the time when symptoms began, the onset time was defined as unknown.                                                                  | 59% AIS<br>58% ICH |
| Door-time (date/time)                                                                   |                                                                         | The time of arrival at emergency room. In case the patient has a stroke while admitted to the hospital, then the time when the neurologist sees with patient as the door-time.                                                                                                                 | **                 |
| Diagnosis                                                                               | Ischemic stroke <sup>1</sup> /<br>Intracerebral hemorrhage <sup>2</sup> | <sup>1</sup> Excluded are: transient ischemic attack, (stroke as a result of) cavernous sinus thrombosis.<br><sup>2</sup> Excluded are: subarachnoid hemorrhage, subdural/ epidural hematoma, hemorrhage from arteriovenous malformation, hemorrhagic transformation of space-occupying lesion | **                 |
| Intravenous thrombolysis                                                                | No/Yes                                                                  | Administration of alteplase intravenously (0.9 milligram/kilogram of which 10% is given in bolus and remaining 90% in one hour consecutively)                                                                                                                                                  | 90.7%              |
| Needle-time (date/time)                                                                 |                                                                         | Time of start intravenous thrombolysis                                                                                                                                                                                                                                                         | 94.6%              |
| Intraarterial thrombectomy                                                              | No/Yes                                                                  | Intracranial mechanical thrombectomy                                                                                                                                                                                                                                                           | 87%                |
| Groin-time (date/time)                                                                  |                                                                         | Time of groin puncture (at the start of the intraarterial thrombectomy)                                                                                                                                                                                                                        | 85%                |
| <b>Outcome indicator</b>                                                                |                                                                         |                                                                                                                                                                                                                                                                                                |                    |
| Course of admission                                                                     | Hospital discharge/<br>Death                                            |                                                                                                                                                                                                                                                                                                | 91%                |
| Follow-up                                                                               | Modified Rankin Scale score                                             | Internationally used scale ranging from no symptoms (0) to death (6).                                                                                                                                                                                                                          | 49% AIS<br>45% ICH |
| *Variables are anonymized in dataset/withheld from dataset due to privacy legislation.  |                                                                         |                                                                                                                                                                                                                                                                                                |                    |
| **Inclusioncriteria: if variable is not registered, patient is not included in analysis |                                                                         |                                                                                                                                                                                                                                                                                                |                    |
